# Supplementary material for: FTIR Spectroscopy for Evaluation and Monitoring of Lipid Extraction Efficiency for Oleaginous Fungi
Source: PLOS journal article supplement (doi:10.1371/journal.pone.0170611), 2017-01-24
Supplement: S2 (10.1371/journal.pone.0170611.s002) [file journal.pone.0170611.s002]

## S1 Fig FTIR spectra

This supporting information includes: FTIR spectra of glucuronic acid and glycerol standards (Fig A); Spectra of *M.alpina* and *M.circinelloides* biomass grown under non-lipid producing conditions (Fig B); Infrared spectra of fungal biomass before and after lipid extraction when a modified Bligh method was applied (Fig C); FTIR spectra of acid hydrolysis treatment of *M.alpina* biomass (Fig D); Different bead beating exposure times for Folch, Bligh and Lewis extraction from *M.circinelloides* biomass (Fig E).

### FTIR Spectroscopy for Evaluation and Monitoring of Lipid Extraction Efficiency for Oleaginous Fungi

Kristin Forfang<sup>1, 2\*</sup>, Boris Zimmermann<sup>1</sup>, Gergely Kosa<sup>1,2</sup>, Achim Kohler<sup>1</sup>, Volha Shapaval<sup>1,2</sup>.

<sup>1</sup>Department of Mathematical Sciences and Technology, Norwegian University of Life Sciences, Drøbakveien 31, Ås, Norway.

<sup>2</sup>Nofima AS, Osloveien 1, 1430 Ås, Norway.

\*Corresponding author:

Kristin Forfang  
Department of Mathematical Sciences and Technology  
Norwegian University of Life Sciences  
Drøbakveien 31, 1430 Ås  
Tel: +47 672 31 643  
E-mail: [kristin.forfang@nmbu.no](mailto:kristin.forfang@nmbu.no)

### Table of Contents

|                                                                                                                   |          |
|-------------------------------------------------------------------------------------------------------------------|----------|
| FTIR spectra of glucuronic acid and glycerol.....                                                                 | S1 Fig-2 |
| Spectra of <i>M.alpina</i> and <i>M.circinelloides</i> biomass grown<br>under non-lipid producing conditions..... | S1 Fig-3 |
| Modification of the Bligh extraction method.....                                                                  | S1 Fig-4 |
| Acid hydrolysis pretreatment of <i>M.alpina</i> biomass.....                                                      | S1 Fig-5 |
| Bead beating exposure time.....                                                                                   | S1 Fig-6 |

## FTIR spectra of glucuronic acid and glycerol

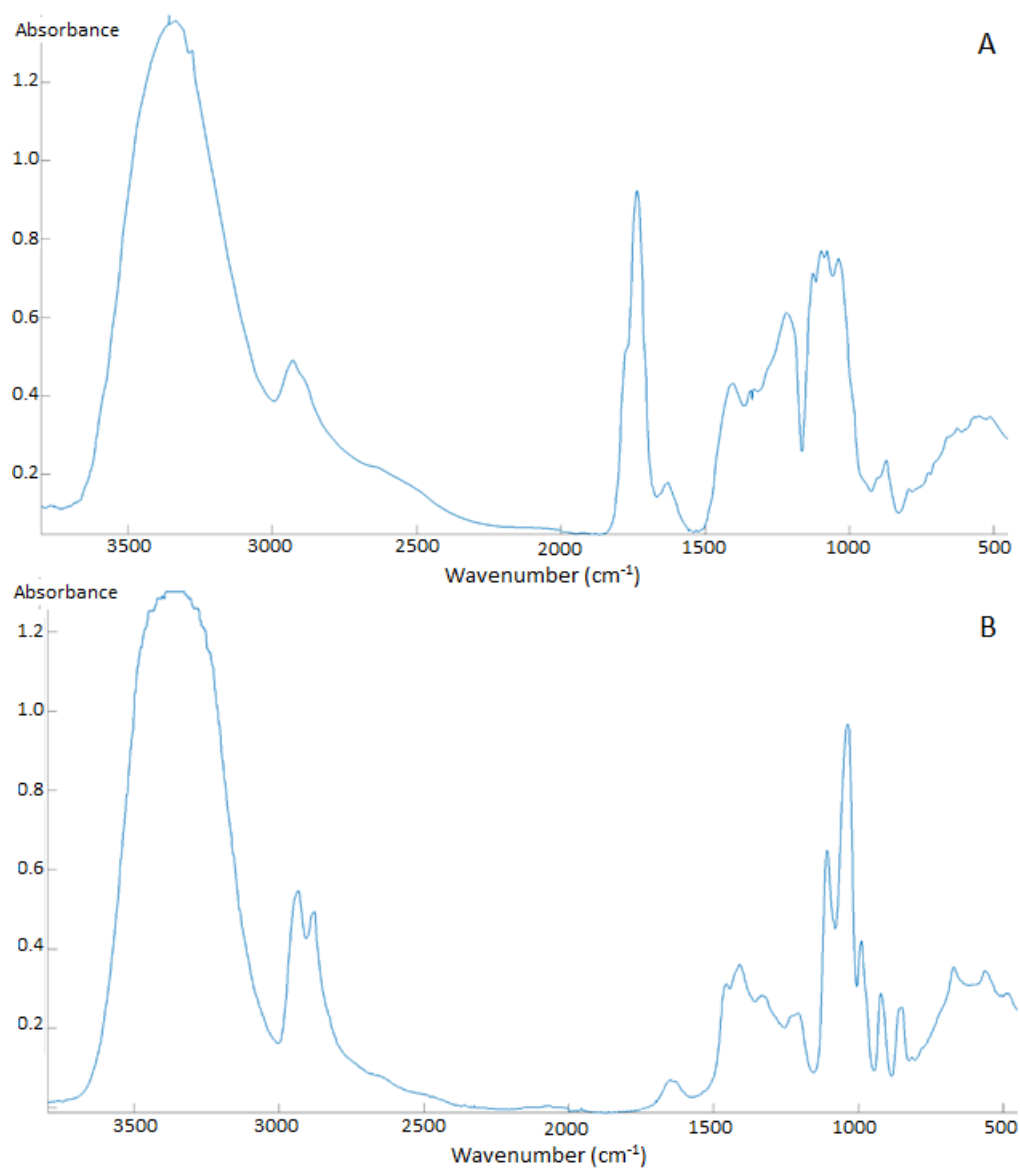

**Fig A.** FTIR spectra of glucuronic acid and glycerol. Infrared spectra were recorded of standard compounds glucuronic acid (A) and glycerol (B).

**Spectra of *M.alpina* and *M.circinelloides* biomass grown under non-lipid producing conditions**

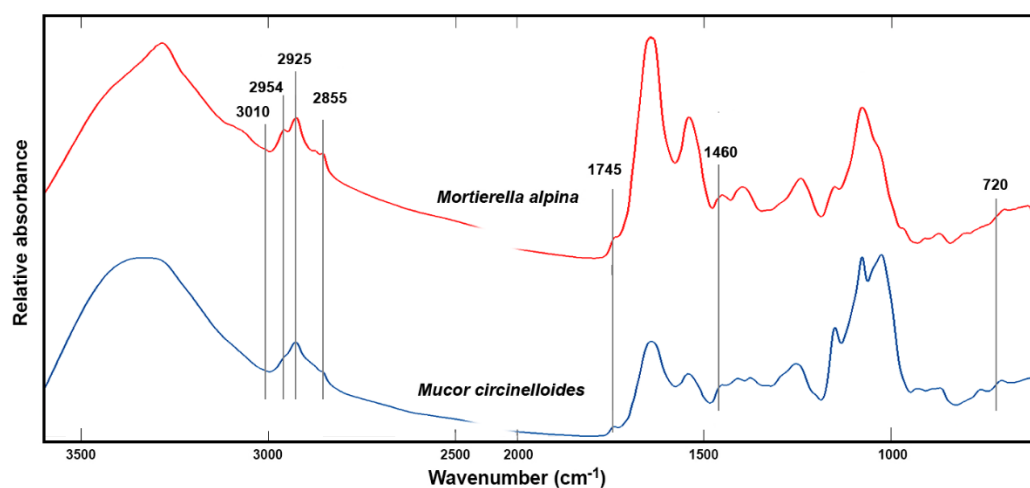

**Fig B.** Spectra of non-lipid producing fungal biomass. FTIR spectra of *Mortierella alpina* and *Mucor circinelloides* biomass grown under non-lipid producing conditions (no nitrogen limitation).

## Modification of the Bligh extraction method

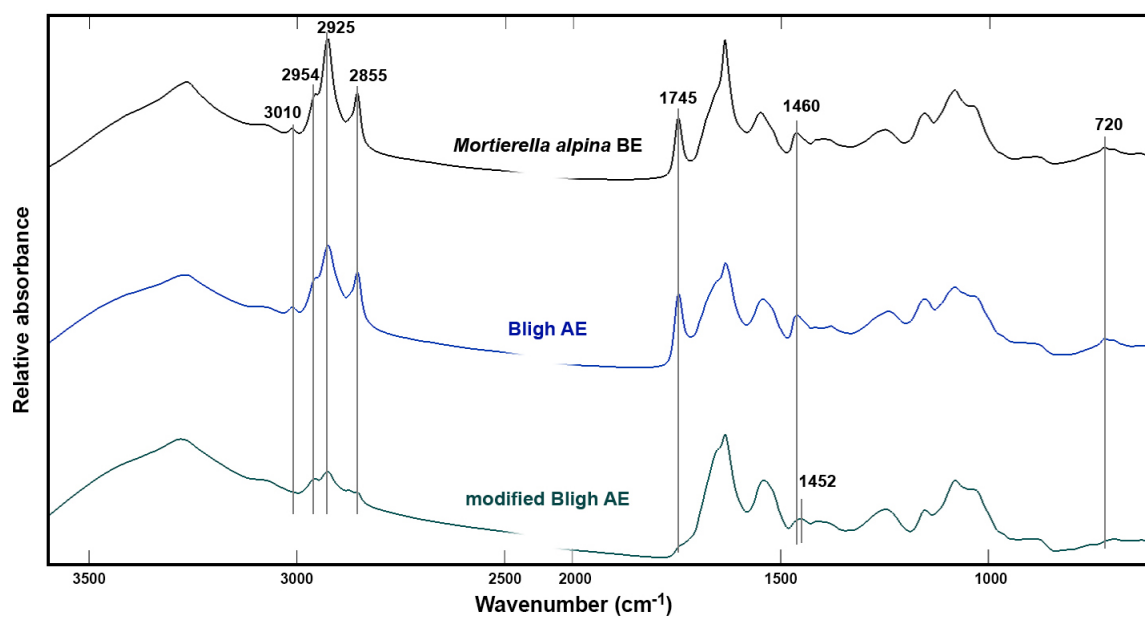

**Fig C.** Modification of the Bligh method. Infrared spectra of *Mortierella alpina* biomass were recorded before (BE) and after extraction (AE) using the original Bligh method and a modified Bligh method (Bligh 20:1). In the modified method, the initial solvent/sample ratio was increased from 3:1 to 20:1 (similar to the ratio applied in the Folch method).

## Acid hydrolysis pretreatment of *M.alpina* biomass

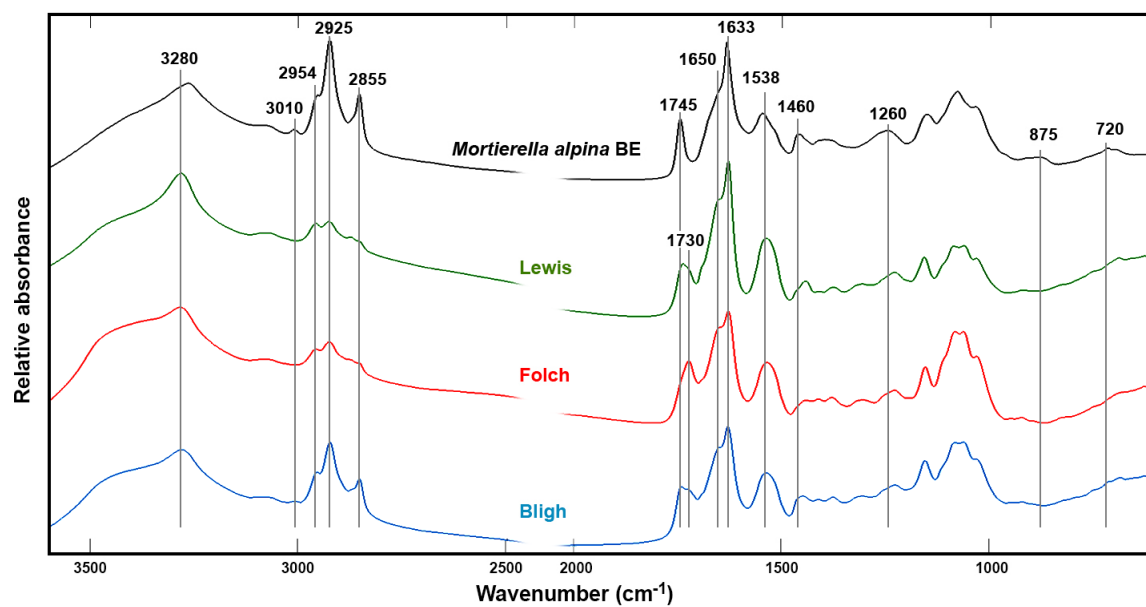

**Fig D.** Acid hydrolysis pretreatment of *M.alpina* biomass. Infrared spectra of *Mortierella alpina* biomass were recorded before (BE) and after acid hydrolysis pretreatment and extraction using the methods of Bligh, Folch and Lewis.

## Bead beating exposure time

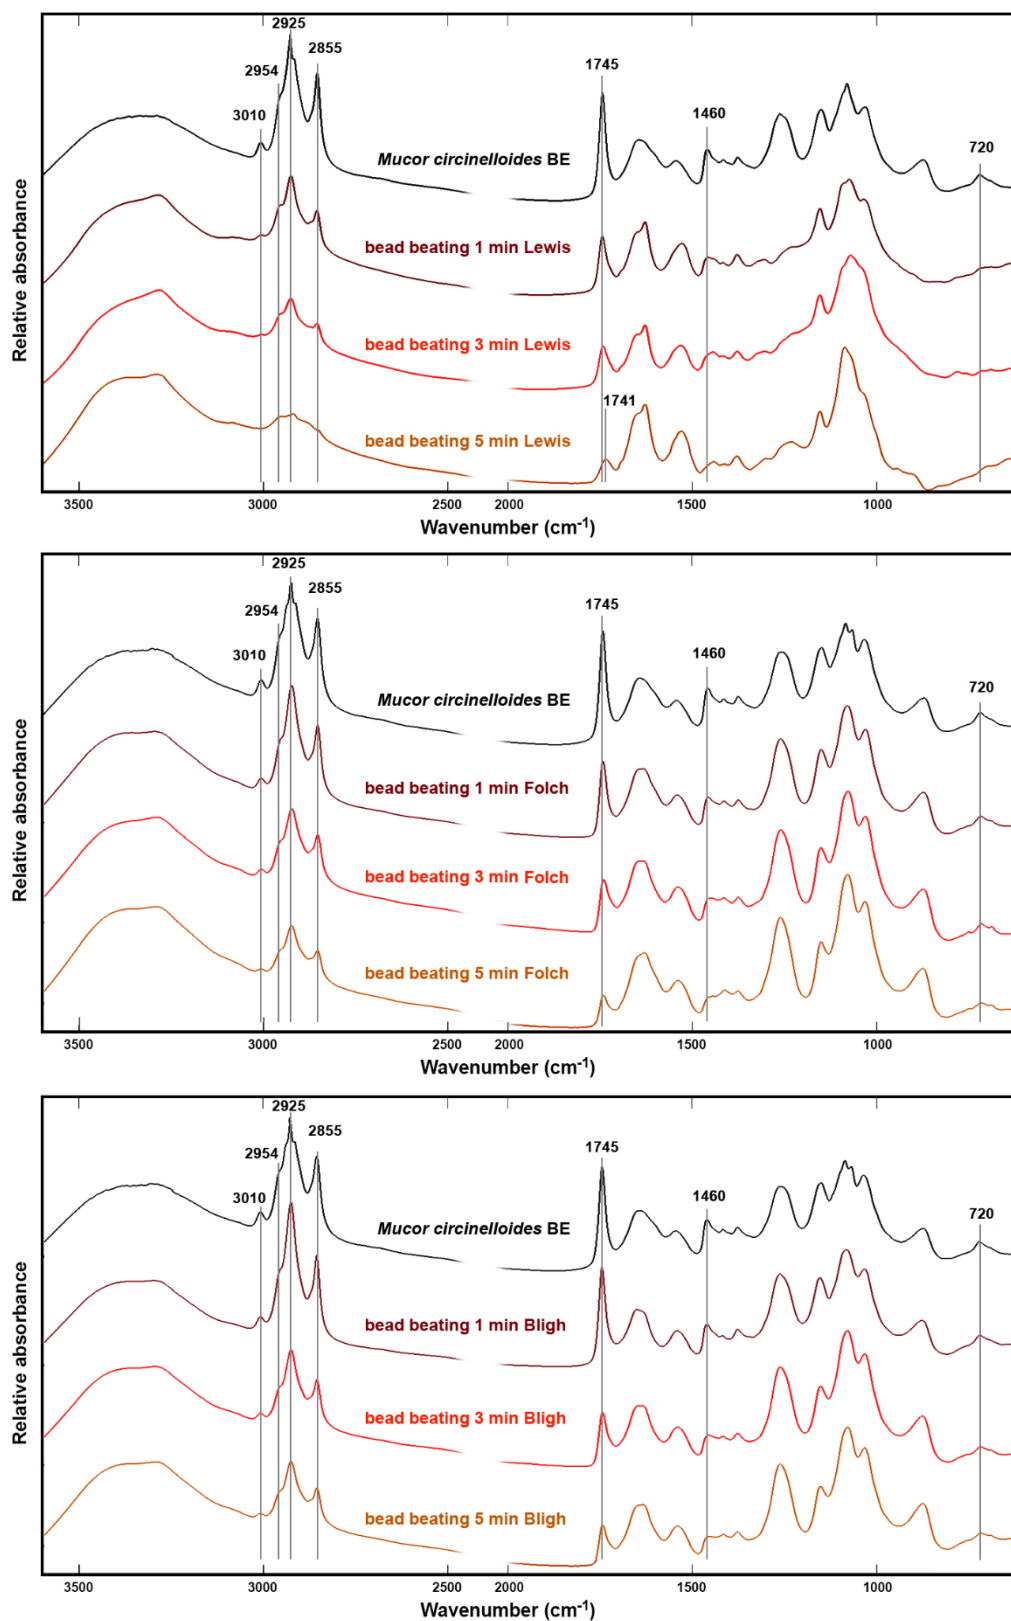

**Fig E.** FTIR spectra of *M.circinelloides* biomass after bead beating exposure. *Mucor circinelloides* biomass was disrupted by bead beating for 1, 3 and 5 min and infrared spectra were recorded of the biomass before (BE) and after extraction using the Bligh, Folch and Lewis methods.
